# Supplementary material for: Synthesis and oxidation catalysis of a difluoride-incorporated polyoxovanadate and isolation of active vanadium alkylperoxo species
Source: Royal Society of Chemistry journal article supplement (doi:10.1039/d1cy02103f), 2022-01-01
Supplement: d1cy02103f1.pdf [file d1cy02103f1.pdf]

**Supplementary Information**

Table S1. Reports on both peroxo-vanadium structures determined by X-ray crystallographic analysis and catalytic reactivity in the same articles.

| entry | reactive peroxo-vanadium species                                                                                        | catalytic reaction                        | ref. |   |                                                                                                   |                  |    |
|-------|-------------------------------------------------------------------------------------------------------------------------|-------------------------------------------|------|---|---------------------------------------------------------------------------------------------------|------------------|----|
| 1     | { <sup>n</sup> Bu <sub>4</sub> N} <sub>3</sub> [V <sub>12</sub> O <sub>30</sub> (OO <sup>t</sup> Bu)F <sub>2</sub> ]    | epoxidation of alkenes                    | This |   |                                                                                                   |                  |    |
|       |                                                                                                                         | bromination of alkenes and chlorodimedone | work |   |                                                                                                   |                  |    |
| 2     | VO(O <sub>2</sub> )(PAH)(phen)                                                                                          | bromination of olefinic alcohols          | S1   |   |                                                                                                   |                  |    |
| 3     | { <sup>n</sup> Bu <sub>4</sub> N}[VO <sub>2</sub> (pca) <sub>2</sub> ]                                                  | oxidation of alkane                       | S2   |   |                                                                                                   |                  |    |
| 4     | [VO(O <sub>2</sub> )(Byim)(MeOH)]ClO <sub>4</sub>                                                                       | bromination of aromatic alcohols          | S3   |   |                                                                                                   |                  |    |
| 5     | { <sup>n</sup> Bu <sub>4</sub> N}[{Ph <sub>3</sub> SiO <sub>2</sub> VO(O <sub>2</sub> )]                                | oxidation of 2-methylcyclohexanone        | S4   |   |                                                                                                   |                  |    |
| 6     | {NH <sub>4</sub> }[VO(O <sub>2</sub> )(mpa)]<br>K <sub>2</sub> [VO(O <sub>2</sub> )nta]<br>K[VO(O <sub>2</sub> )Hheida] | bromination of aromatic substrate         | S5   |   |                                                                                                   |                  |    |
|       |                                                                                                                         |                                           |      | 7 | K[VO(O <sub>2</sub> )ada]<br>[VO(O <sub>2</sub> )bpg]<br>[VO(O <sub>2</sub> )tpa]ClO <sub>4</sub> | halide oxidation | S6 |
|       |                                                                                                                         |                                           |      |   |                                                                                                   |                  |    |

PAHH = *N*-(1-phenyl acetyl acetyl)hydroxamic acid, phen = phenanthroline, Hpca = pyrazine-2-carboxylic acid, Byim = 2,6-di(1*H*-benzo[d]imidazole-2-yl)pyridine, dipic = pyridinedicarboxylate, mpa = 4-methoxypicolinamide, H<sub>3</sub>nta = nitrilotriacetic acid, H<sub>3</sub>neida = *N*-(2-hydroxyethyl)iminodiacetic acid, H<sub>2</sub>ada = *N*-(2-amidomethyl)iminodiacetic acid, Hbpg = *N,N*-bis(2-pyridylmethyl)glycine, tpa = *N,N,N*-tris(2-pyridylmethyl)amine,

Table S2. Reported fluoride-incorporated polyoxovanadates.

| entry | anion formula                                                                            | coordination geometry of vanadium atoms         | ref.      |
|-------|------------------------------------------------------------------------------------------|-------------------------------------------------|-----------|
| 1     | $[\text{V}_{12}\text{O}_{30}(\text{O}'\text{Bu})\text{F}_2]^{3-}$                        | Square pyramid, Tetrahedron                     | This work |
| 2     | $[\text{V}_{12}\text{O}_{30}(\text{acac})\text{F}_2]^{3-}$                               | Square pyramid                                  | This work |
| 3     | $[\text{V}_{12}\text{O}_{30}(\text{OO}'\text{Bu})\text{F}_2]^{3-}$                       | Square pyramid                                  | This work |
| 4     | $[\text{V}_7\text{O}_{19}\text{F}\{\text{CH}_2\}_3\text{CCH}_2\text{OH}\}^{4-}$          | Square pyramid, Tetrahedron                     | 46        |
| 5     | $[\text{V}_{12}\text{O}_{30}\text{F}_2\{\text{CH}_2\}_3\text{CCH}_2\text{OH}\}_2]^{6-}$  | Square pyramid                                  | 46        |
| 6     | $[\text{V}_{10}\text{O}_{28}\text{F}_2\{(\text{CH}_2\}_3\text{CCH}_2\text{OH}\}_2]^{4-}$ | Square pyramid                                  | 46        |
| 7     | $[\text{V}_7\text{O}_{19}\text{F}]^{4-}$                                                 | Square pyramid, Tetrahedron                     | 44        |
| 8     | $[\text{HV}_{11}\text{O}_{29}\text{F}_2]^{4-}$                                           | Square pyramid                                  | 35        |
| 9     | $[\text{V}_{10}\text{O}_{30}\text{F}_2]^{4-}$                                            | Square pyramid                                  | 43,S8     |
| 10    | $[\text{V}_{12}\text{O}_{30}\text{F}_4(\text{H}_2\text{O})_2]^{4-}$                      | Square pyramid                                  | 47        |
| 11    | $[\text{V}_{14}\text{O}_{36}\text{F}_4]^{8-}$                                            | Square pyramid, tetrahedron, trigonal bipuramid | 48        |
| 12    | $[\text{V}_{14}\text{O}_{36}\text{F}_2(\text{L})_2]^{6-}$                                | Square pyramid, tetrahedron, trigonal bipuramid | 49        |
| 13    | $[\text{V}_{14}\text{O}_{34}\text{F}_6]^{4-}$                                            | Square pyramid, tetrahedron, trigonal bipuramid | 50        |
| 14    | $[\text{V}_2\text{O}_{30}\text{F}_2(\text{pic})_2]^{6-}$                                 | Square pyramid                                  | 50        |
| 15    | $[\text{Bi}_2(\text{DMSO})_6\text{V}_{10}\text{O}_{28}\text{F}_2]^{3-}$                  | Square puramid                                  | 41        |
| 16    | $[\{\text{Pd}(\text{NO}_3)(\text{DMSO})\}_2\text{V}_{12}\text{O}_{32}(\text{F})_2]^{4-}$ | Square pyramid, tetrahedron                     | 43        |
|       | different structures from above polyoxovanadates                                         |                                                 |           |
| 17    | $[\text{V}_4\text{O}_8(\text{glut})_2\text{F}]^-$                                        |                                                 | S9        |
| 18    | $[\text{V}_6\text{O}_6\text{F}(\text{OH})_3\{(\text{OCH}_2\}_3\text{CCH}_3\}_3]^-$       |                                                 | 51        |
| 19    | $[\text{V}_{16}\text{O}_{38}\text{F}]^{4-}$                                              | Square pyramid                                  | 32        |

L = pyridine, pyrazine, imidazole. pic = picolinate. DMSO = dimethyl sulfoxide. glut = glutarate

**Table S3.** Crystallographic data for V12-O'Bu, V12-acac and V12-OO'Bu

|                                                             | V12-O'Bu                                                                                        | V12-acac                                                                                       | V12-OO'Bu                                                                                       |
|-------------------------------------------------------------|-------------------------------------------------------------------------------------------------|------------------------------------------------------------------------------------------------|-------------------------------------------------------------------------------------------------|
| formula                                                     | C <sub>113</sub> H <sub>252</sub> F <sub>4</sub> N <sub>6</sub> O <sub>71</sub> V <sub>24</sub> | C <sub>59</sub> H <sub>126</sub> F <sub>2</sub> N <sub>4</sub> O <sub>34</sub> V <sub>12</sub> | C <sub>104</sub> H <sub>234</sub> F <sub>4</sub> N <sub>6</sub> O <sub>64</sub> V <sub>24</sub> |
| fw                                                          | 4129.75                                                                                         | 2084.91                                                                                        | 3891.52                                                                                         |
| crystal system                                              | monoclinic                                                                                      | monoclinic                                                                                     | orthorhombic                                                                                    |
| space group                                                 | <i>P2<sub>1</sub>/n</i> (#14)                                                                   | <i>P2<sub>1</sub>/n</i> (#14)                                                                  | <i>Pca2<sub>1</sub></i> (#29)                                                                   |
| <i>a</i> (Å)                                                | 15.7550(3)                                                                                      | 17.7995(4)                                                                                     | 17.1990(4)                                                                                      |
| <i>b</i> (Å)                                                | 25.4335(4)                                                                                      | 23.6442(5)                                                                                     | 21.6914(5)                                                                                      |
| <i>c</i> (Å)                                                | 21.5604(4)                                                                                      | 20.9424(4)                                                                                     | 54.0590(12)                                                                                     |
| $\beta$ (deg)                                               | 92.2530(10)                                                                                     | 91.9450(10)                                                                                    | 90                                                                                              |
| <i>V</i> (Å <sup>3</sup> )                                  | 8632.7(3)                                                                                       | 8808.6(3)                                                                                      | 20167.8(8)                                                                                      |
| <i>Z</i>                                                    | 2                                                                                               | 4                                                                                              | 8                                                                                               |
| $\mu$ (mm <sup>-1</sup> )                                   | 11.096                                                                                          | 10.872                                                                                         | 9.441                                                                                           |
| <i>R</i> <sub>1</sub> ( <i>I</i> > 2 $\sigma$ ( <i>I</i> )) | 0.0358                                                                                          | 0.0559                                                                                         | 0.0905                                                                                          |
| <i>wR</i> <sub>2</sub>                                      | 0.0925                                                                                          | 0.1455                                                                                         | 0.2254                                                                                          |

Table S4. Comparison of the catalytic performance for the epoxidation of cyclooctene with <sup>t</sup>BuOOH as an oxidant with previously reported polyoxometalate catalysts.

| entry                    | catalyst                                                                                          | molar ratio<br>cat:substrate:oxidant | temp.<br>/ °C | time<br>/ h | selectivity<br>of epoxide | TON   | ref.      |
|--------------------------|---------------------------------------------------------------------------------------------------|--------------------------------------|---------------|-------------|---------------------------|-------|-----------|
| polyoxometalate catalyst |                                                                                                   |                                      |               |             |                           |       |           |
| 1                        | $[V_{12}O_{30}(O^tBu)F_2]^{3-}$                                                                   | 0.0083:1:1                           | 32            | 2.5         | >99%                      | 105   | This work |
| 2                        | $CS_7[PW_{10}Cu_2(H_2O)_2O_{38}] \cdot 9H_2O$                                                     | unknown (15mg):1:1.5                 | 60            | 20          | 81%                       | 851   | S10       |
| 3                        | $\{Hptz\}_4[SiMo_{12}O_{40}]$                                                                     | 0.01:1:1.5                           | 70            | 24          | >99%                      | 100   | S11       |
| 4                        | $\{(n\text{-hexyl})_4N\}_4[Mo_2O_2((2\text{-OPh})CH=NCH_2CH_2CH_2Si)_2\text{-}SiW_{11}O_{39}]$    | 0.02:1:3                             | 75            | 6           | >99%                      | 50    | S12       |
| 5                        | $\{(n\text{-hexyl})_4N\}_4[Mo_2O_2(acac)(NH_2CH_2CH_2CH_2Si)_2\text{-}SiW_{11}O_{39}]$            | 0.0016:1:3                           | 75            | 8           | >99%                      | 62    | S13       |
| 6                        | 15 wt% Vanadomolybdophosphoric acids wet-impregnated on hydrated titania                          | 0.01:2                               | 80            | 5           | >99%                      | 1150  | S14       |
| 7                        | $CP_3[PMo_{12}O_{40}]$                                                                            | 0.000002:1:1.5                       | 80            | 24          | 53.1%                     | 12000 | S15       |
| 8                        | $C_{15}H_{34}MoN_6O_{43}SiW_{11}$                                                                 | 0.0042:1:2.24                        | reflux        | 0.5         | >99%                      | 170   | S16       |
| 9                        | $[H(C_{10}H_{10}N_2)Cu_2][PMo_{12}O_{40}]$                                                        | 0.0002:1:0.4                         | 85            | 12          | 80%                       | 3000  | S17       |
| 10                       | $H_4[SiMo_{12}O_{40}]$ employed to support on amine functionalized Hydrous zirconia nanoparticles | 0.0093:1:2                           | reflux        | 2           | 98% yield                 | 105   | S18       |
| 11                       | $H_3[PMo_{12}O_{40}]$ employed to support on on amine functionalized Boehmite nanoparticles       | 0.0157:1:2                           | reflux        | 0.25        | 98% yield                 | 62    | S19       |
| 12                       | $\{Bu_4N\}_2[Mo_6O_{19}]$                                                                         | 0.00025:1:2                          | 80            | 6           | 87%                       | 123   | S20       |
| 13                       | $[Ni_2(fsa)_7(H_2O)(SiMo_{12}O_{40})]$                                                            | 0.0006:1:0.017                       | 80            | 48          | 97.21%                    | 117   | S21       |
| 14                       | $[Mo_{36}(NO)_4O_{108}(H_2O)_{16}]^{12-}$ on amine functionalized SBA-15                          | 0.0045:1:2                           | reflux        | 1.5         | 98%                       | 220   | S22       |
| 15                       | $[H(atrz)]_4[(atrz)_2(Mo_8O_{26})]$                                                               | 0.005:1:1                            | 45            | 12          | >99%                      | 184   | S23       |
| 16                       | $(NH_4)_{12}[Mo_{36}(NO)_4O_{108}(H_2O)_{16}]$ supported on the clinoptilolite zeolite            | 0.0005:1:2                           | reflux        | 3           | >99%                      | 1800  | S24       |
| 17                       | $[PMo_{10}V_2O_{40}]^{5-}$ immobilized on ionic liquid-modified MCM-41                            | 0.006:1:0.01                         | reflux        | 25          | 90%                       | 276   | S25       |

ptz = 5-(2-pyridyl)tetrazole, CP = 1-butylpyridinium, fsa = bis(4chlorophenyl)propyl triazole, atrz = 3-amino-1,2,4-triazole

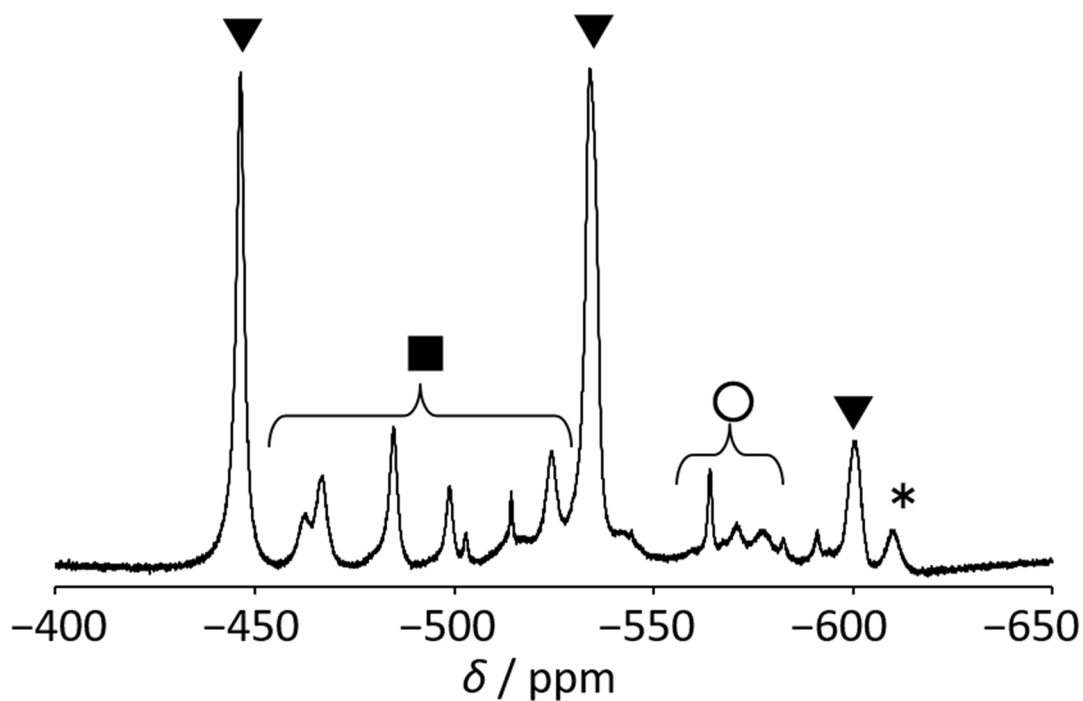

Figure S1.  $^{51}\text{V}$  NMR spectrum after the reaction of  $\{\text{Bu}_4\text{N}\}_4[\text{V}_{12}\text{O}_{32}(\text{CH}_3\text{NO}_2)]$  with 1.5 equiv. of  $\{\text{Bu}_4\text{N}\}\text{F}$  in nitromethane. The triangles, square, circle and asterisk represent the peaks due to V7, V11,  $[\text{V}_{12}\text{O}_{32}(\text{CH}_2\text{NO}_2)]^{5-}$  and  $[\text{V}_5\text{O}_{14}]^{4-}$ , respectively. The reaction conditions were same as those of the previously reported anion insertion into dodecavanadates<sup>S26</sup>  $[\text{V}_{12}\text{O}_{32}(\text{CH}_2\text{NO}_2)]^{5-}$  was formed because of proton removal by the effect from the basicity of  $\{\text{Bu}_4\text{N}\}\text{F}$ .<sup>S27</sup>

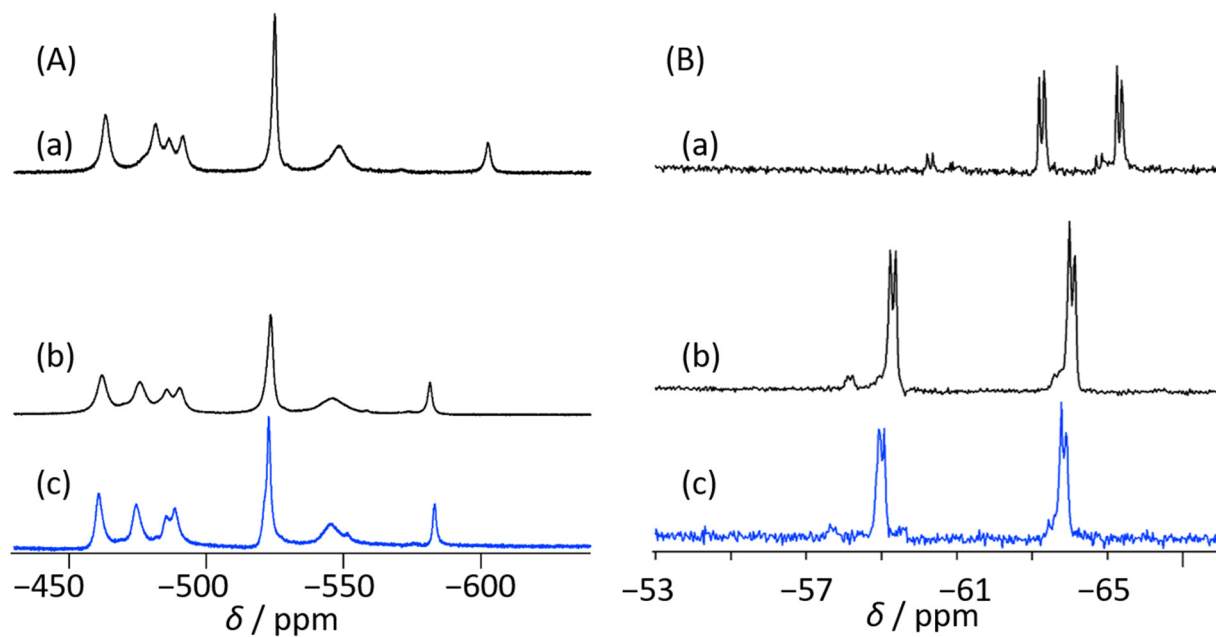

Figure S2. (A)  $^{51}\text{V}$  and (B)  $^{19}\text{F}$  NMR spectra of V12-OO'Bu (a) before and (b) after the quantitative reaction with cyclooctene. Spectra (c) are those of the authentic sample of V12-O'Bu. Reaction conditions: cyclooctene 1 mmol,  $\text{CD}_3\text{NO}_2$  2 mL, V12-OO'Bu 0.077 mmol, naphthalene 0.2 mmol, 90 min,  $25^\circ\text{C}$ . 90% yield of cyclooctene oxide based on V12-OO'Bu was detected in GC.

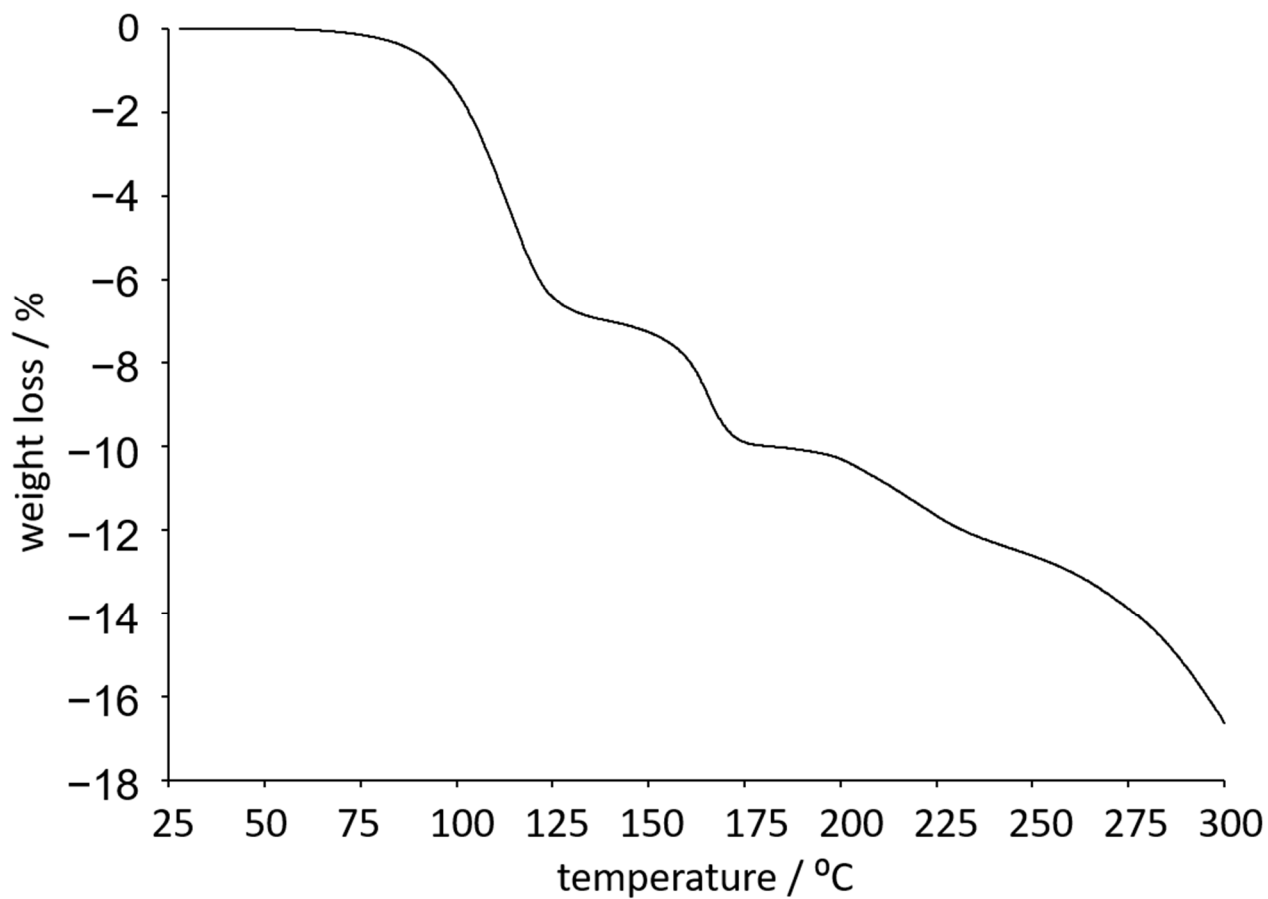

Figure S3. TG data of V12-O'Bu. The first step of the weight loss is -6.58% at 127 °C due to 1.5 molecules of  $(\text{CH}_3)_2\text{CO}_3$  and the second one is -10.06 % at 187 °C due to 1 molecule of  $t\text{BuOH}$ . The weight loss over 200 °C is due to the decomposition of tetra-*n*-butylammonium.

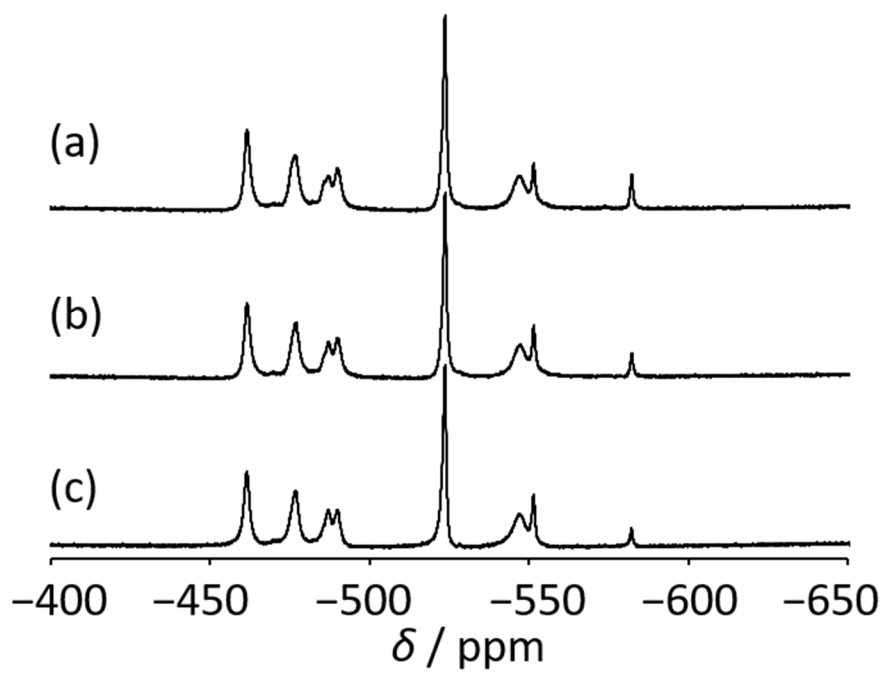

Figure S4.  $^{51}\text{V}$  NMR spectra of V12-O<sup>t</sup>Bu in the presence of (a) 1, (b) 1.5 and (c) 2 equiv. of  $^i\text{PrOH}$  in acetonitrile.



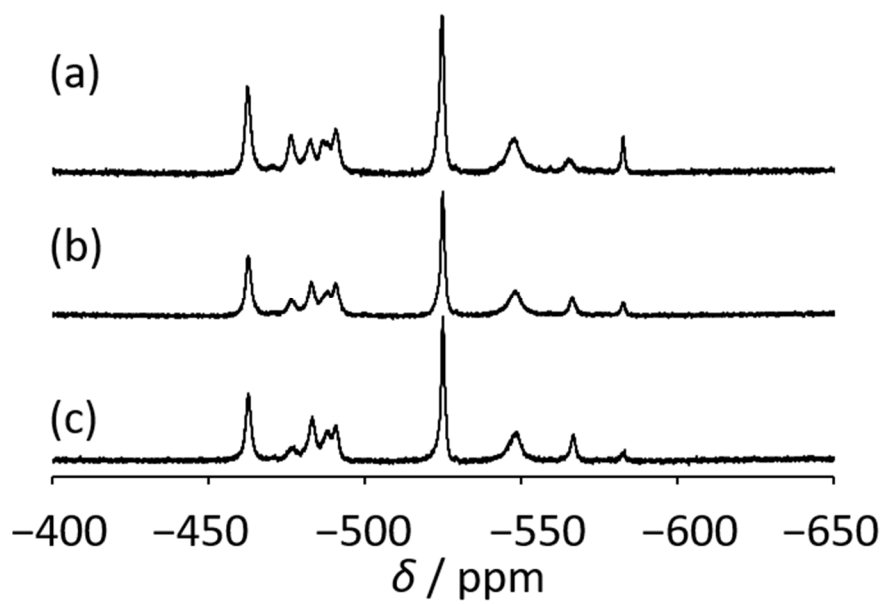

Figure S5.  $^{51}\text{V}$  NMR spectra of V12-O<sup>t</sup>Bu in the presence of (a) 2, (b) 5 and (c) 10 equiv. of AcOH in acetonitrile.

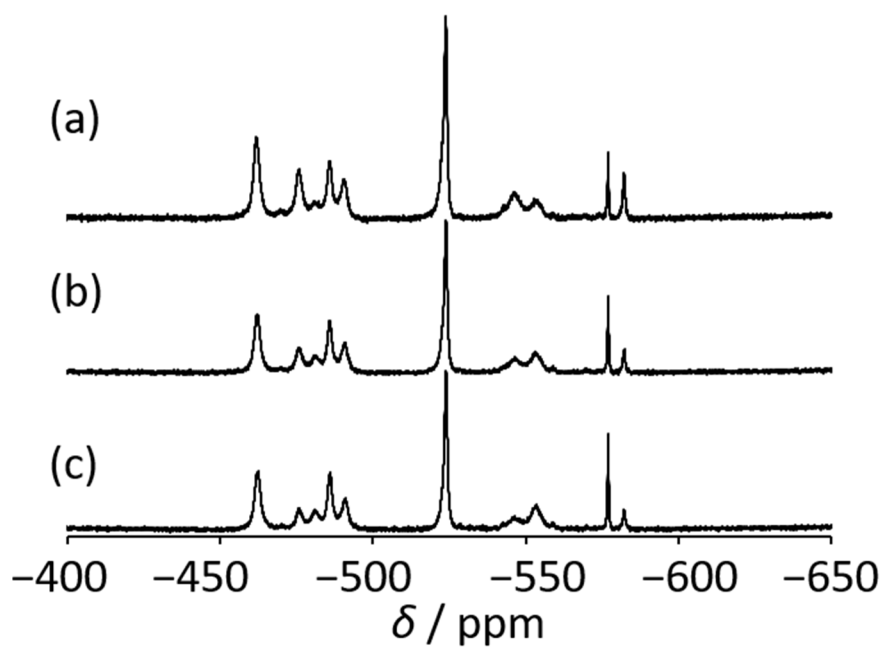

Figure S6.  $^{51}\text{V}$  NMR spectra of V12-O<sup>t</sup>Bu in the presence of (a) 0.4, (b) 0.6 and (c) 0.8 equiv. of acacH in acetonitrile.

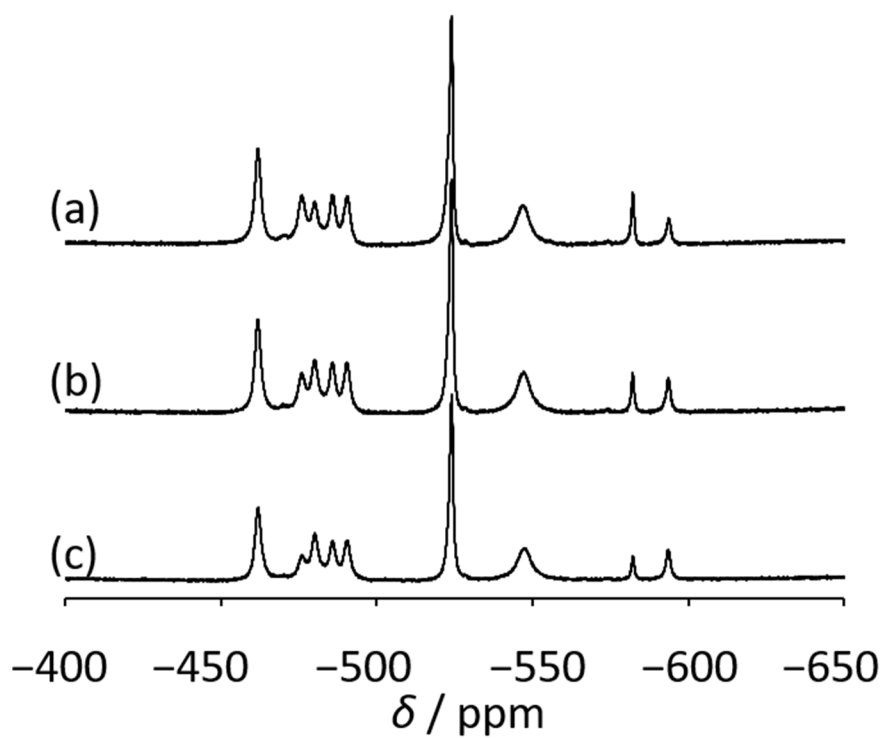

Figure S7.  $^{51}\text{V}$  NMR spectra of V12-O'Bu in the presence of (a) 2.8, (b) 5.5 and (c) 11 equiv. of  $t\text{BuOOH}$  in acetonitrile. The lowest peak of V12-OO'Bu was shifted probably due to the different solvent system.

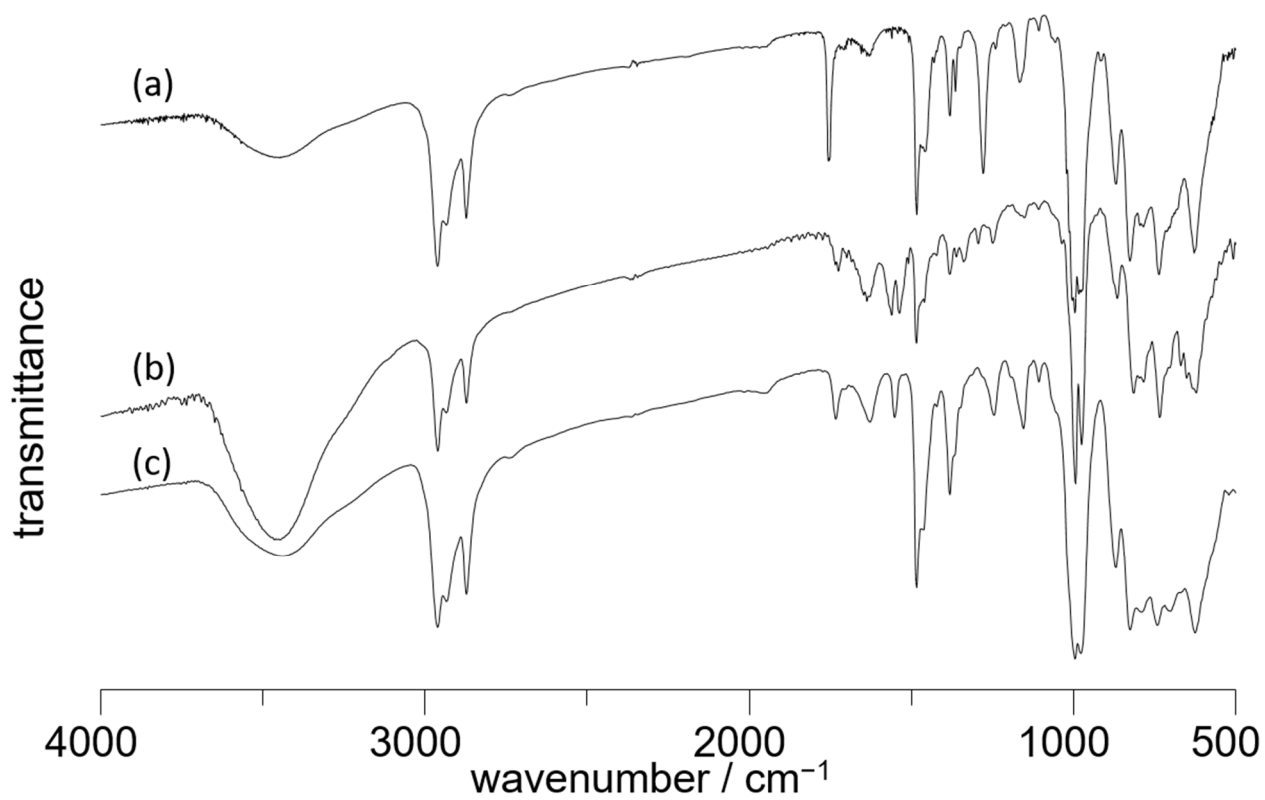

Figure S8. IR spectra of (a) V12-O'Bu, (b) V12-acac and (c) V12-OO'Bu.

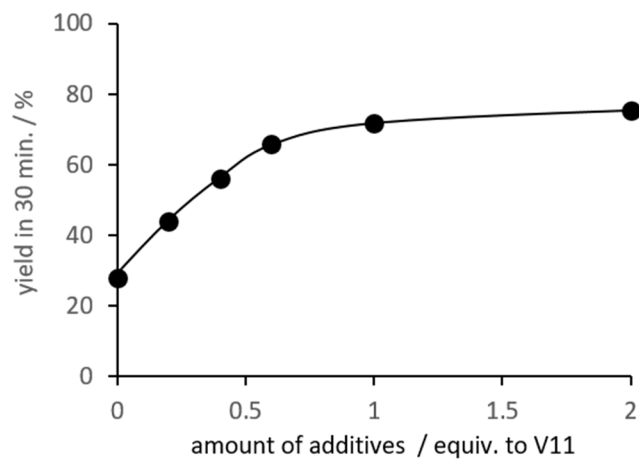

Figure S9. Yield in 30 min for epoxidation of cyclooctene as a function of the amount of added TsOH. Reaction conditions: Cyclooctene (1 mmol), <sup>t</sup>BuOOH (5.5 M in decane, 1 mmol), V11 (9.1 μmol), propylene carbonate/dichloromethane 2 mL (1:1. v/v), TsOH (0–2 equiv. to V11), naphthalene (0.2 mmol, internal standard), 32°C. Yields were determined by GC. With an increase in the amount of added p-toluenesulfonic acid (TsOH) with respect to V11, the yield of cyclooctene oxide in 0.5 h gradually increased and reached a plateau after further addition of more than 1 equiv. of TsOH.

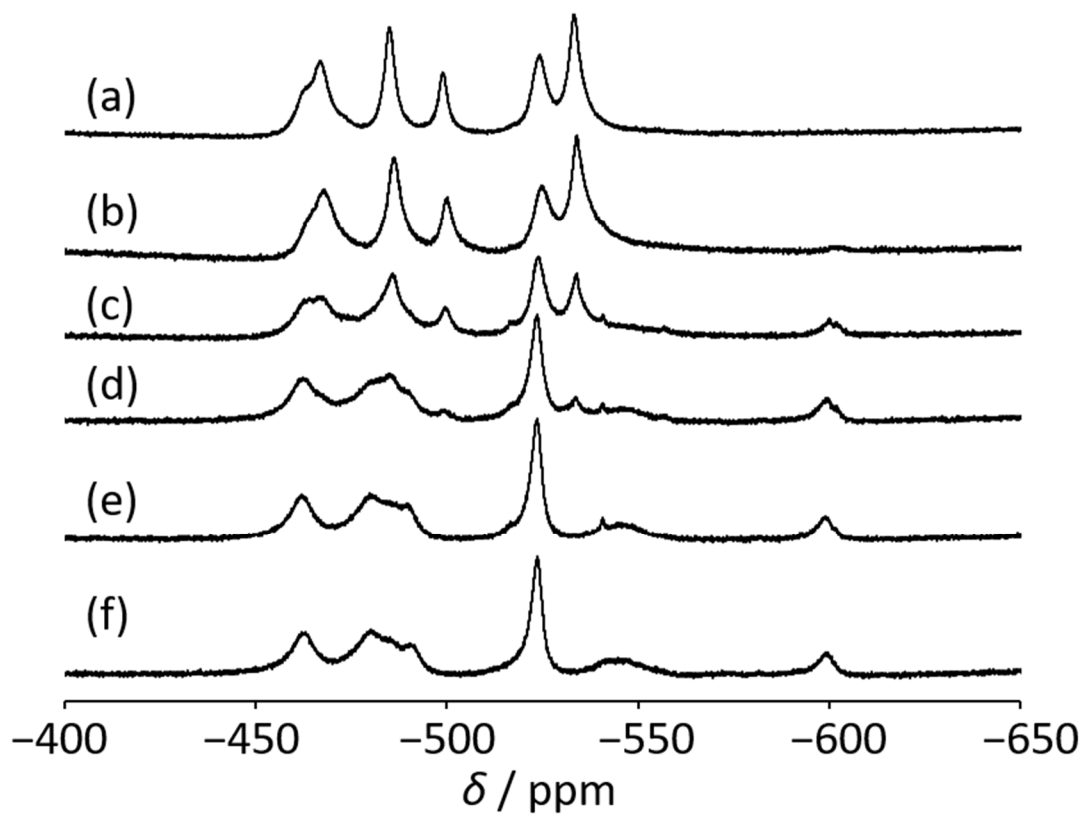

Figure S10.  $^{51}\text{V}$  NMR spectra of V11 (a) without and with 100 equiv. of  $t\text{-BuOOH}$  in the presence of (b) 0, (c) 0.4, (d) 0.8, (e) 1.3 and (f) 1.8 equiv. of  $\text{TsOH}$  with respect to V11. Without addition of acid, signals due to alkyperoxo-vanadium species were not observed.

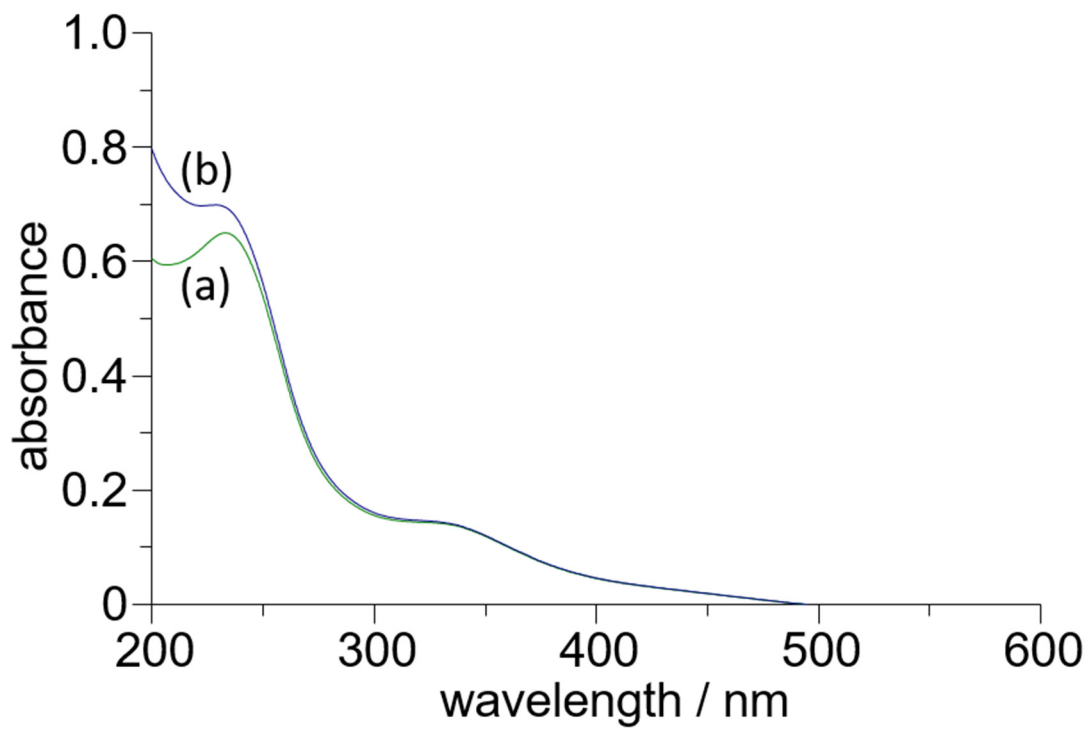

Figure S11. UV-vis spectra of acetonitrile solution of V12-O'Bu (a) before and (b) after addition of 100 equiv. of 5.5 M *t*-BuOOH in decane solution. The concentration of V12-O'Bu was  $1.5 \times 10^{-5}$  M.

### Additional references

- S1. T. K. Si, S. S. Paul, M. G. B. Drew, K. K. Mukherjea, *Dalton Trans.* 2012, **41**, 5805-5815.
- S2. G. Süß-Fink, S. Stanislas, G. B. Shulpin, G. V. Nizova, H. Stockli-Evans, A. Neels, C. Bobillier, S. Claude, *J. Chem. Soc. Dalton Trans.* 1999, 3169-3175.
- S3. E. Palmajumder, S. Patra, M. G. B. Drew, K. K. Mukherjea, *New J. Chem.* 2016, **40**, 8696-8703.
- S4. M. Vennat, J.-M. Brégeault, P. Herson, *Dalton Trans.* 2004, 908-913.
- S5. P. Chen, S. Zhang, J. Zhang, W. Xia, X. Yu, *J. Coord. Chem.* 2019, **72**, 239-250.
- S6. G. J. Colpas, B. J. Hamstra, J. W. Kampf, V. L. Pecoraro, *J. Am. Chem. Soc.* 1996, **118**, 3469-3478.
- S7. G. J. Colpas, B. J. Hamstra, J. W. Kampf, V. L. Pecoraro, *J. Am. Chem. Soc.* 1994, **116**, 3627-3628.
- S8. A. Müller, R. Rohlfing, A.-L. Barra, D. Getteschi, *Adv. Mater.* 1993, **5**, 915-919.
- S9. M. Gómez, A. Pastor, E. Álvarez, J. L. Olloqui-Sariego, A. Gailindo, *Dalton Trans.* 2018, **47**, 2183-2191.
- S10. A. Patel, R. Sadasivan, *Inorg. Chim. Acta* 2017, **485**, 101-108.
- S11. M. S. Nunes, P. Neves, A. C. Gomes, L. Cunha-Silva, A. D. Lopes, A. A. Valente, M. Pillinger, I. S. Gonçalves, *Inorg. Chim. Acta* 2021, **516**, 120129.
- S12. M. Moghadam, V. Mirkhani, S. Tangestaninejad, I. Mohammadpoor-Baltork, M. M. Javadi, *Polyhedron*, 2010, **29**, 648-654.
- S13. M. Moghadam, V. Mirkhani, S. Tangestaninejad, I. Mohammadpoor-Baltork, M. M. Javadi, *Inorg. Chim. Acta* 2010, **13**, 244-249.
- S14. R. H. Ingle, A. Vinu, S. B. Halligudi, *Catal. Commun.* 2008, **9**, 931-938.
- S15. B. Guérin, D. M. Fernandes, J.-C. Daran, D. Agustin, R. Poli, *New J. Chem.* 2013, **37**, 3466-3475.
- S16. S. S. Hosseinyzade, F. M. Zonoz, B. Bahramian, *Catal. Lett.* 2018, **148**, 1324-1335.
- S17. S. Roy, V. Vemuri, S. Maiti, K. S. Manoj, U. Subbarao, S. C. Peter, *Inorg. Chem.* 2018, **57**, 12078-12092.
- S18. M. Mirzaee, B. Bahramian, M. Shahraki, H. Moghadam, A. Mirzaee, *Catal. Lett.* 2018, **148**, 3003-3017.
- S19. M. Mirzaee, B. Bahramian, A. Ashrafian, A. Amoli, *Appl. Organomet. Chem.* 2018, **32**, e4011.
- S20. J. Pisk, B. Prugovečki, D. Matkvić-Čalogović, T. Jednačak, P. Novak, D. Agustin, V. Vrdoljak, *RSC adv.* 2014, **4**, 39000-39010.
- S21. L. Zhou, J. Liu, W. Ji, H. Huang, H. Hu, Y. Liu, Z. Kang, *J. Mater. Chem. A* 2014, **2**, 12686-12691.
- S22. M. Bagherzadeh, H. Hosseini, S. Akbayrak, S. Özkar, *ChemistrySelect.* 2019, **4**, 5911-5917.
- S23. H. Gao, J. Yu, J. Du, H. Niu, J. Wang, X. Song, W. Zhang, M. Jia, *J. Clust. Sci.* 2014, **25**, 1263-1272.
- S24. M. Bagherzadeh, H. Hosseini, *J. Coord. Chem.* 2017, **70**, 2212-2223.
- S25. R. Hajian, S. Tangestaninejad, M. Moghadam, V. Mirkhani, I. Mohammadpoor-Baltork, A. R. Khosropour, *J. Coord. Chem.* 2011, **64**, 4134-4344.
- S26. S. Kuwajima, Y. Kikukawa, Y. Hayashi, *Chem. Asian J.* 2017, **12**, 1909-1914.
- S27. Y. Kikukawa, H. Kitajima, S. Kuwajima, Y. Hayashi, *Molecules* 2020, **25**, 5670.
